# Supplementary material
Source: Springer Nature journal article supplement (https://www.springermedizin.de/resource/supplementary/12874_2008_395_MOESM9_ESM.pdf/9434384)

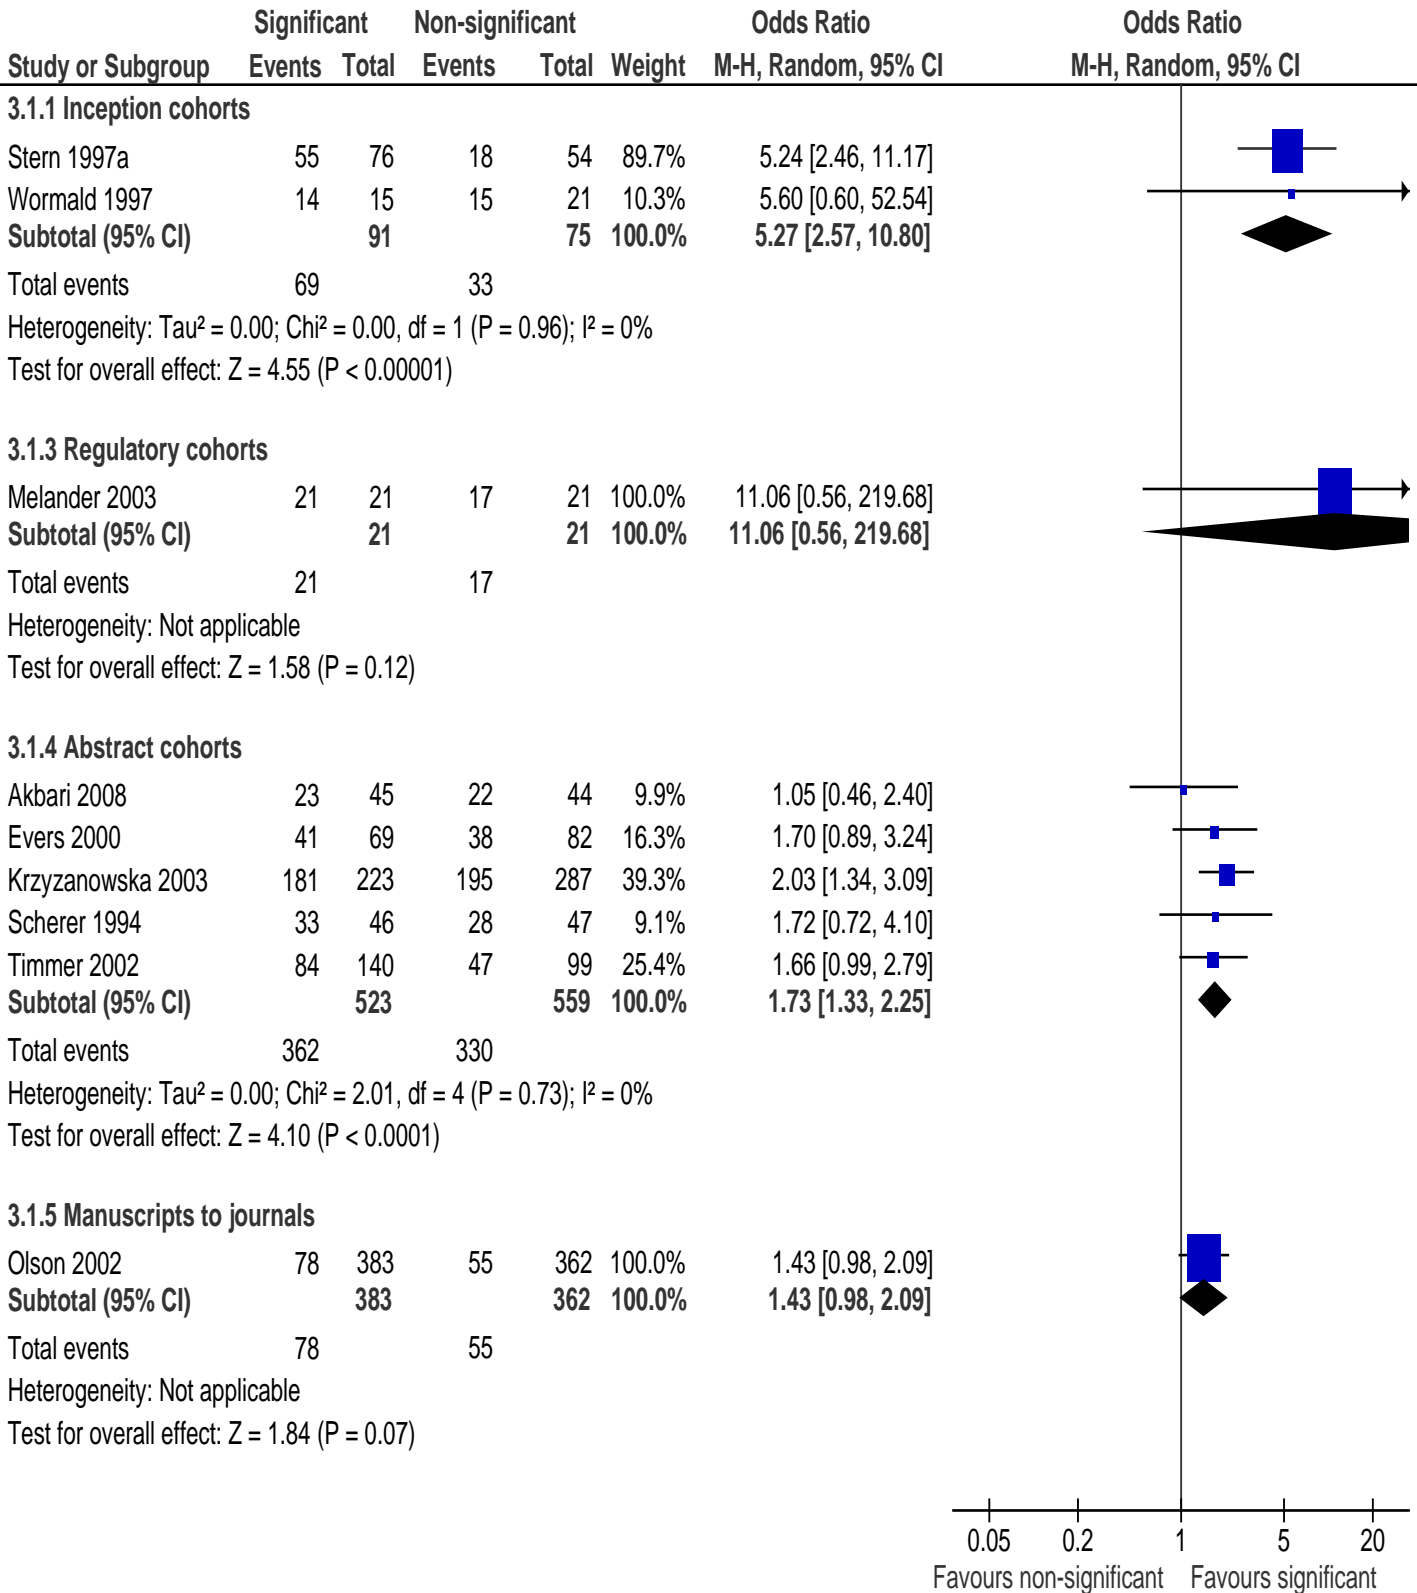

0.05 0.2 1 5 20  
Favours non-significant Favours significant

Supplement: MOESM9 [file 9434384]
